# Supplementary material for: Epigenetic control of the angiotensin-converting enzyme in endothelial cells during inflammation
Source: PLoS One. 2019 May 1;14(5):e0216218. doi: 10.1371/journal.pone.0216218 (PMC6494048; doi:10.1371/journal.pone.0216218)
Supplement: S2 File — The criteria are those mentioned in Materials and methods. (XLSX) [file pone.0216218.s005.xlsx]

## Sheet: Fig. 1
A															B									C						D
	time	solvent						TNFa									solvent 24h	solvent 48h	solvent 72h	TNFa 24	TNFa 48	TNFa 72				0h Ctrl	24h TNF	48h TNF				solvent	TNF 24h	TNF 48h
	0	1	1	1	1	1	1	1	1	1	1	1	1			bacth 1	1	1	1	0.623768	0.487813	0.206003			batch 1	1	0.22	0.14			batch 1	1	0.112862	0.0842999
	2	1.01	1.27	0.89	0.74	1.13	1.04	0.85	0.87	0.79	0.94	1.03	0.82			bacth 2	1	1	1	0.790702	0.450822	0.217816			batch 2	1	0.3	0.18			batch 2	1	0.143584	0.125106
	4	1.02	1.18	0.98	0.8	0.99	1.07	0.61	0.73	0.59	0.75	0.66	0.62			bacth 3	1	1	1	0.736061	0.533407	0.407507			batch 3	1	0.22	0.09			batch 3	1	0.320713	0.146546
	8	0.93	1.27	1.06	0.74	1.14	0.94	0.5	0.47	0.51	0.57	0.5	0.58			bacth 4	1	1	1	0.613185	0.360208	0.268088
	16	0.82	1.38	0.91	0.78	1.19	1.05	0.45	0.34	0.34	0.38	0.38	0.41			bacth 5		1	1		0.371664	0.214998
	24	0.91	1.28	0.96	0.81	1.03	1.08	0.28	0.41	0.32	0.34	0.39	0.37												ACE vs. HKG						ACE vs. b-actin
	48	0.85	1.39	0.95	0.91	0.99	0.99	0.3	0.18	0.22	0.2	0.26	0.29				ACE vs. NMM
	batch no	1	2	3	4	5	6	1	2	3	4	5	6
		ACE vs. HKG

## Sheet: Fig. 2
A													B							C
	time	solvent					TNFa										+72h recovery				upstream site
	0	1	1	1	1	1	0.24	0.45	0.26	0.31	0.34				solvent	TNF/24h	solv/24h	TNF/24h
	8	1	1	1	1	1	0.48	0.41	0.38	0.22	0.38			batch 1	1	0.623768	0.806593	0.606233				sol/meC	TNFa meC			sol/MAX	TNFa MAX
	24	1	1	1	1	1	0.13	0.11	0.75	1.09				batch 2	1	0.790702	1.89485	1.13091			batch 1	1	0.892		batch 1	1	0.184
	48	1	1	1	1	1	0.81	0.81	0.85	1.05	0.55			batch 3	1	0.736061	1.10246	0.951541			batch 2	1	2.378		batch 2	1	0.236
	72	1	1	1	1	1	1.12	0.93	1.16	1.36	0.94			batch 4	1	0.516794	1.52599	0.883498			batch 3	1	2.836		batch 3	1	0.168
														batch 5	1	0.295166	2.59233	1.14825			batch 4	1	2.656		batch 9	1	0.188
	batch no	1	2	3	4	5	1	2	3	4	5			batch 6	1	0.62623	2.6689	0.651521			batch 5	1	2.365		batch 11	1	0.337
														batch 7	1	0.468462	1.01435	0.374835			batch 6	1	2.816
		ACE vs. HKG												batch 8	1	0.388917	1.22307	0.735481			batch 7	1	3.381
														batch 9	1	0.466761	1.38456	0.440681			batch 8	1	1.471
																					batch 9	1	2.832
																					batch 10	1	2.436
															ACE vs. NMM						batch 11	1	2.13
																					5mC vs. input				MAX vs. input
																					CpG site
																						sol/meC	TNFa meC			sol/MAX	TNFa MAX
																					batch 1	1	3.976		batch 1	1	0.051
																					batch 4	1	4		batch 2	1	0.001
																					batch 6	1	9.208		batch 4	1	0.001
																					batch 9	1	8.518		batch 5	1	0.017
																					batch 10	1	2.632		batch 8	1	0.056
																					batch 11	1	0.856		batch 9	1	0.383
																					batch 12	1	1.6		batch 11	1	0
																									batch 12	1	0.142
																					5mC vs. input				MAX vs. input
																					6kb upstream control
																						sol/meC	TNFa meC			sol/MAX	TNFa MAX
																					batch 1	1	1.097		batch 1	1	1.05
																					batch 2	1	1.187		batch 2	1	2.22222
																					batch 3	1	0.59		batch 3	1	0.966048
																					batch 4	1	0.984		batch 4	1	0.210526
																					batch 5	1	0.856
																					batch 6	1	1.235
																					5mC vs. input				MAX vs. input

## Sheet: Fig. 3
A															B															C															D
	time	solvent						TNFa								time	solvent						TNFa								time	solvent						TNFa								time	solvent
	0	1	1	1	1	1	1	1	1	1	1	1	1			0	1	1	1	1	1	1	1	1	1	1	1	1			0	1	1	1	1	1	1	1	1	1	1	1	1			0	1	1	1
	2	1	1	1	1	1	1	0.89	1.26	0.81	0.83	0.87	1.25			2	1	1	1	1	1	1	0.91	0.96	1.3	1.21	1.29	1.32			2	1	1	1	1	1	1	0.46	0.84	0.9	0.73	0.49	1.01			4	1	1	1
	4	1	1	1	1	1	1	0.95	1.19	0.56	1.15	0.82	0.76			4	1	1	1	1	1	1	0.55	1.09	1.27	0.74	1.34	0.78			4	1	1	1	1	1	1	0.17	0.35	0.73	0.59	0.69	0.53			8	1	1	1
	8	1	1	1	1	1	1	0.92	0.76	0.87	0.86	0.85	0.63			8	1	1	1	1	1	1	0.92	0.75	1.03	0.81	0.78	0.89			8	1	1	1	1	1	1	0.29	0.76	0.84	0.68	2.41	0.99			16	1	1	1
	16	1	1	1	1	1	1	0.95	1.03	1.28	1.09	0.91	0.98			16	1	1	1	1	1	1	0.98	0.83	0.88	1.06	0.85	1.12			16	1	1	1	1	1	1	0.44	0.55	1.15	0.74	1.14	0.87			24	1	1	1
	24	1	1	1	1	1	1	1.09	1.25	0.66	0.61	1.03	0.73			24	1	1	1	1	1	1	1.07	1.56	0.87	0.97	1.08	1.06			24	1	1	1	1	1	1	0.29	0.5	0.57	0.67	0.73	0.98
																																														batch no	1	2	3
	batch no	1	2	3	4	5	6	1	2	3	4	5	6			batch no	1	2	3	4	5	6	1	2	3	4	5	6			batch no	1	2	3	4	5	6	1	2	3	4	5	6				ACE vs. HKG
		DNMT1 vs. HKG															DNMT3a vs. HKG															DNMT3b vs. HKG
[truncated: 18 more columns]

## Sheet: Fig. 4
A							B									C
		scr		siDNMT1					scr		siDNMT3a		siDNMT3b					scr		siDNMT3a		siDNMT3b
		solvent	TNF	solvent	TNF				solvent	TNF	solvent	TNF	solvent	TNF				solvent	TNF	solvent	TNF	solvent	TNF
	batch 1	1	0.29	1	0.61			batch 1	1	0.6	1.39	0.88	0.96	0.61			batch 1	1	0.49	1	0.69	1	0.87
	batch 2	1	0.39	1	0.23			batch 2	1	0.29	0.98	0.58	0.94	0.64			batch 2	1	0.53	1	0.68	1	0.59
	batch 3	1	0.3	1	0.56			batch 3	1	0.39	0.63	0.71	0.81	0.6			batch 3	1	0.69	1	0.5	1	1.1
	batch 4	1	0.34	1	0.56			batch 4	1		0.69	0.81	0.88	0.87			batch 4	1	0.33	1	0.59	1	1.27
								batch 5	1	0.3	1.17	0.61	1.25	0.37			batch 5	1	0.44	1	0.81	1	0.86
								batch 6	1	0.34	1.44	0.31	1.24	0.26
		ACE vs. HKG						batch 7	1	0.62			1.3	0.9
																		ACE vs. b-actin
									ACE vs. HKG vs. scr/sol.

## Sheet: Fig. 5
A															B													C													D							E
	time	solvent						TNFa								time	solvent					TNFa							time	solvent					TNFa								scr	siTET1	scr	siTET1
	0	1	1	1	1	1	1	1	1	1	1	1	1			0	1	1	1	1	1	1	1	1	1	1			0	1	1	1	1	1	1	1	1	1	1			batch 1			1	0.582245			batch 1
	2	1	1	1	1	1	1	1.02	0.48	0.67	1.2	1.62	1.44			2	1	1	1	1	1	0.8	0.45	0.81	0.63	0.84			2	1	1	1	1	1	1.74	1.4	1.43	1.72	2.1			batch 2	1	0.673799	1	0.59244			batch 2
	4	1	1	1	1	1	1	0.25	0.29	0.14	0.23	0.23	0.77			4	1	1	1	1	1	1.12	0.59	1.34	0.56	1.11			4	1	1	1	1	1	1.36	2.01	1.59	2.14	1.24			batch 3	1	0.82772	1	0.714482			batch 3
	8	1	1	1	1	1	1	0.36	0.34	0.14	0.43	0.32	0.78			8	1	1	1	1	1	0.95	1.38	1.08	0.8	1.65			8	1	1	1	1	1	1.53	1.31	1.41	1.23	1.48			batch 4	1	0.891814	1	0.960512			batch 4
	16	1	1	1	1	1	1	0.19	0.61	0.51	0.72	0.51	0.23			16	1	1	1	1	1	0.91	1.25	0.66	0.61	0.91			16	1	1	1	1	1	1.38	1.4	1.53	1.28	1.25			batch 5	1	0.824504	1	0.790721			batch 5
	24	1	1	1	1	1	1	0.29	0.95	0.16	0.96	0.624	0.76			24	1	1	1	1	1	1.42	1.01	0.91	0.96	1.075			24	1	1	1	1	1	0.9	0.93	1.12	1.31	1.38
																																											TET1 vs. NMM		ACE vs. NMM
																																																	COX-2 vs. HKG
	batch no	1	2	3	4	5	6	1	2	3	4	5	6			batch no	1	2	3	4	5	1	2	3	4	5			batch no	1	2	3	4	5	1	2	3	4	5
		TET1 vs. HKG															TET2 vs. HKG													TET3 vs. HKG
[truncated: 9 more columns]

## Sheet: S1 Fig.
A							B							C
		solvent	TNF						solvent	TNF					time	solvent				SB202190				TNF				SB202190 + TNF
		no	no	yes	R-7050				no	no	yes	DRB			0	1	1	1	1	1	1	1	1	1	1	1	1	1	1	1	1
	batch 1	1	0.32	0.93				batch 1	1	0.74	0.54				4	1	1	1	1	1.35	0.65	0.79	1.45	0.87	0.91	0.38	1	1.33	0.97	1.17	0.55
	batch 2	1	0.23	1.07				batch 2	1	0.83	0.79				8	1	1	1	1	1.11	1.05	1.14	0.75	0.76	0.51	0.9	1.22	1.02	0.56	0.61	0.7
	batch 3	1	0.19	1.35				batch 3	1	0.86	0.61				16	1	1	1	1	1.52	0.87	0.88	0.86	0.33	0.18	0.38	0.21	0.27	0.41	0.44	0.42
															24	1	1	1	1	0.98	0.8	0.92	1.38	0.13	0.14	0.18	0.25	0.28	0.43	0.32	0.23
		ACE vs. HKG							ACE vs. HKG						batch no	1	2	3	4	1	2	3	4	1	2	3	4	1	2	3	4
																ACE vs. HKG vs. solv./Ctrl

## Sheet: S2 Fig.
B
		solv/24h	TNF/24h
	batch 1	1	1.06342
	batch 2	1	0.801007
	batch 3	1	0.66813
	batch 4	1	1.45229
	batch 5	1	0.674559
	batch 6	1	1.46902
	MAX vs. NMM

## Sheet: S3 Fig.
A
		scr	si1	si3a	si3b
	batch 1	1	0.1	0.66	0.32
	batch 2	1	0.21	0.55	0.61
	batch 3	1	0.4	0.68	0.16
	batch 4	1	0.22	0.8	0.36
	batch 5	1			0.37
	batch 6	1			0.67
	batch 7	1			0.06
	batch 8	1			0.07
			DNMT1 vs. HKG vs. scr
				DNMT3a vs. HKG vs. scr
					DNMT3b vs. HKG vs. scr
