# Supplementary material for: Epigenetic control of the angiotensin-converting enzyme in endothelial cells during inflammation
Source: PLOS journal article supplement (doi:10.1371/journal.pone.0216218), 2019-05-01

Figure 1

**B**

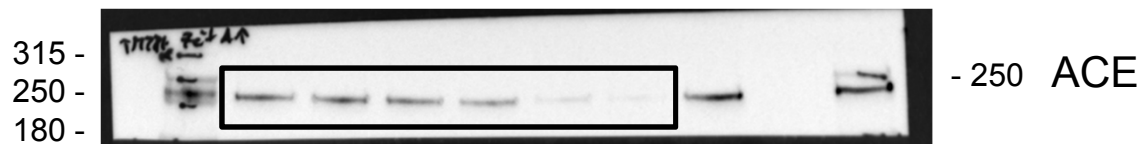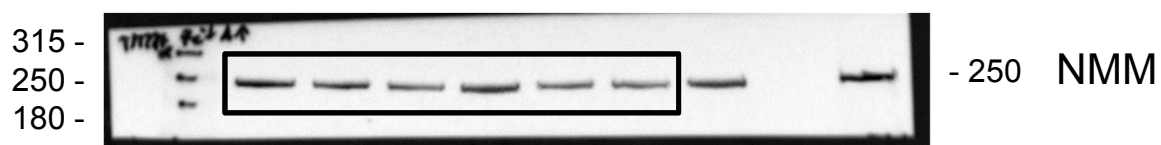

**D**

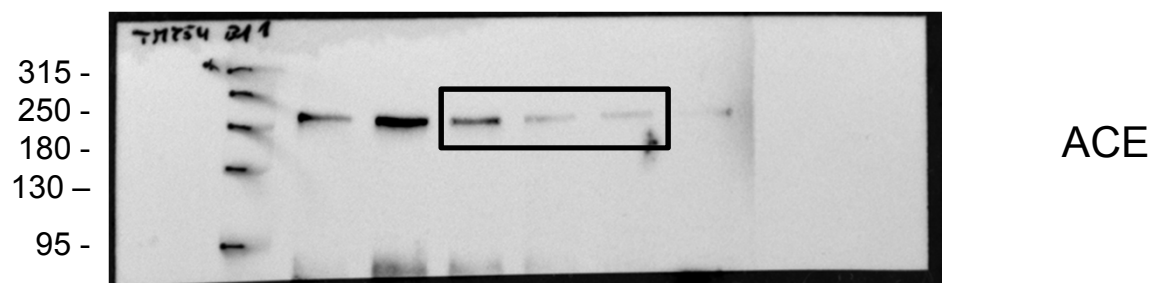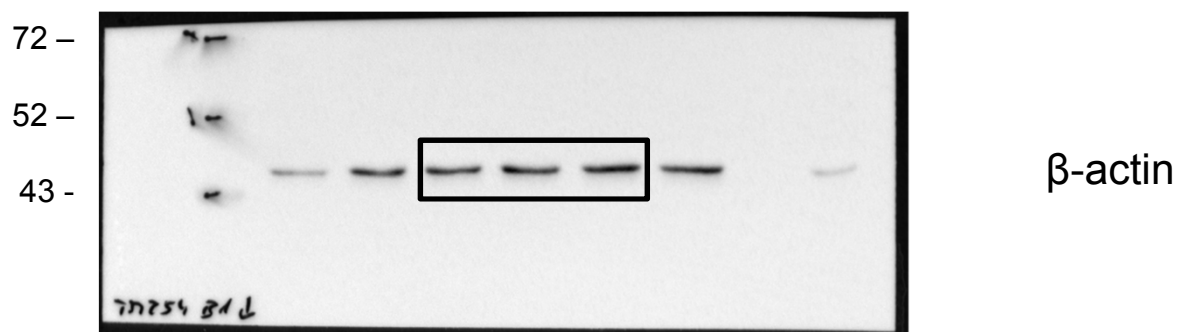

Figure 2

**B**

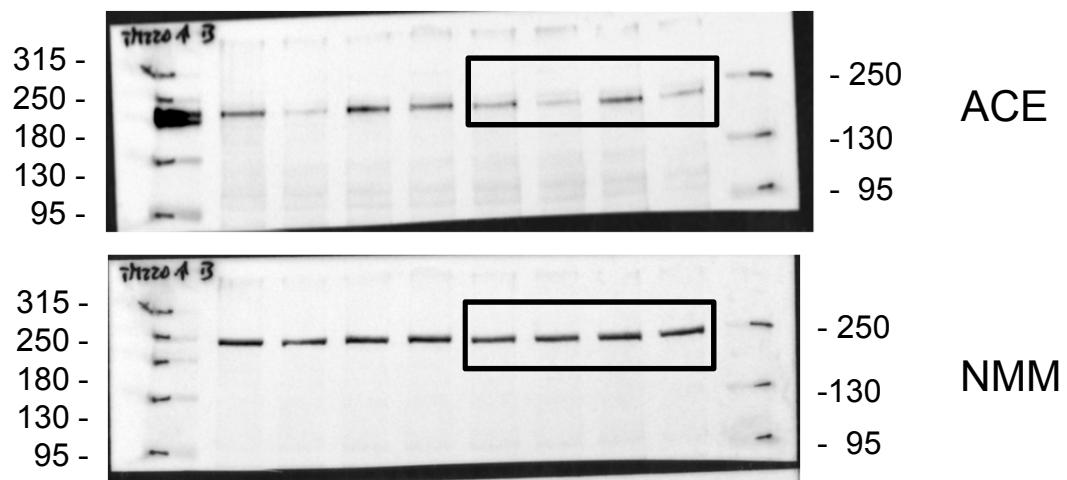

Figure 3

**E**

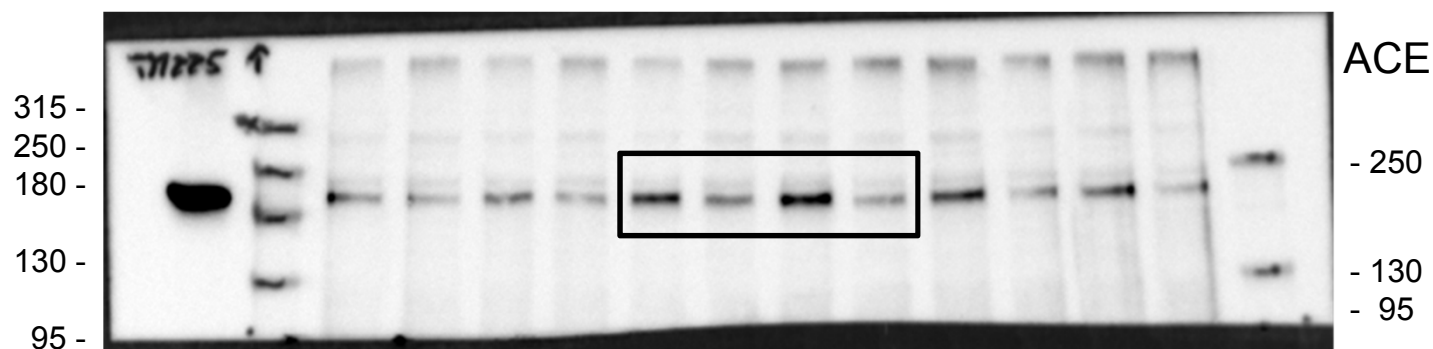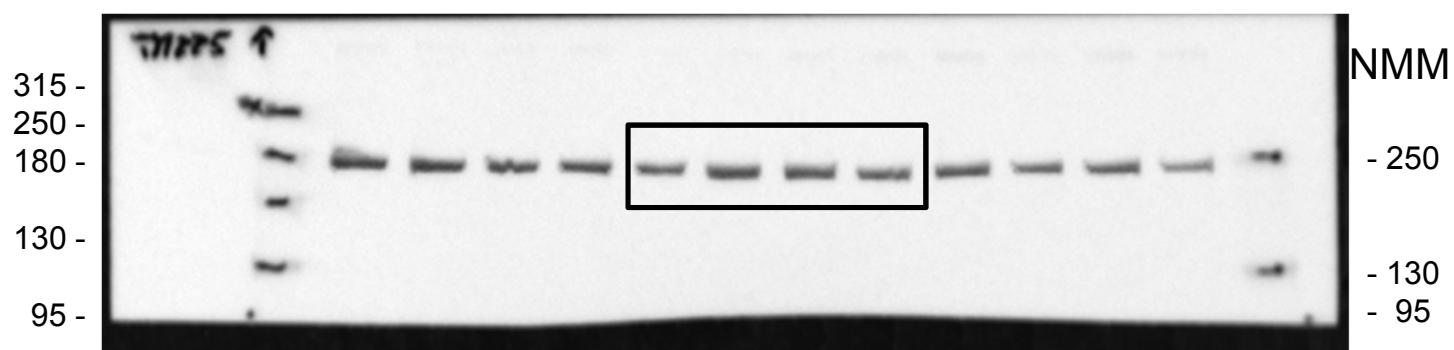

Figure 4

C

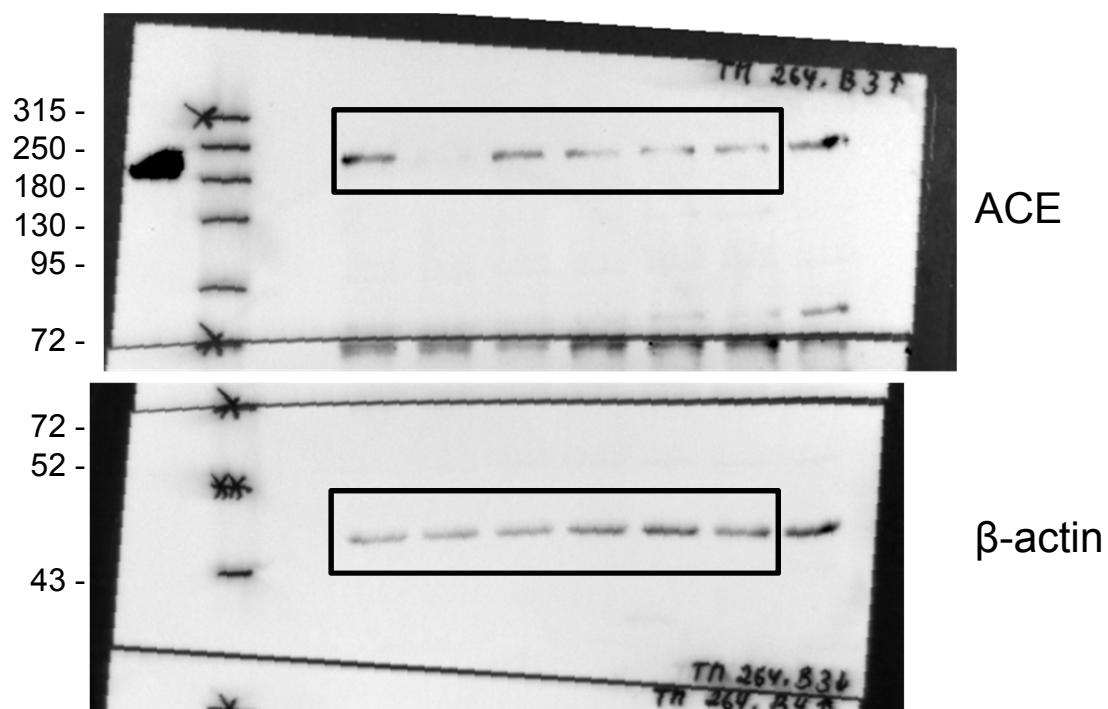

Figure 5

**D**

TET1

315 -  
250 -  
180 -  
130 -  
95 -  
72 -

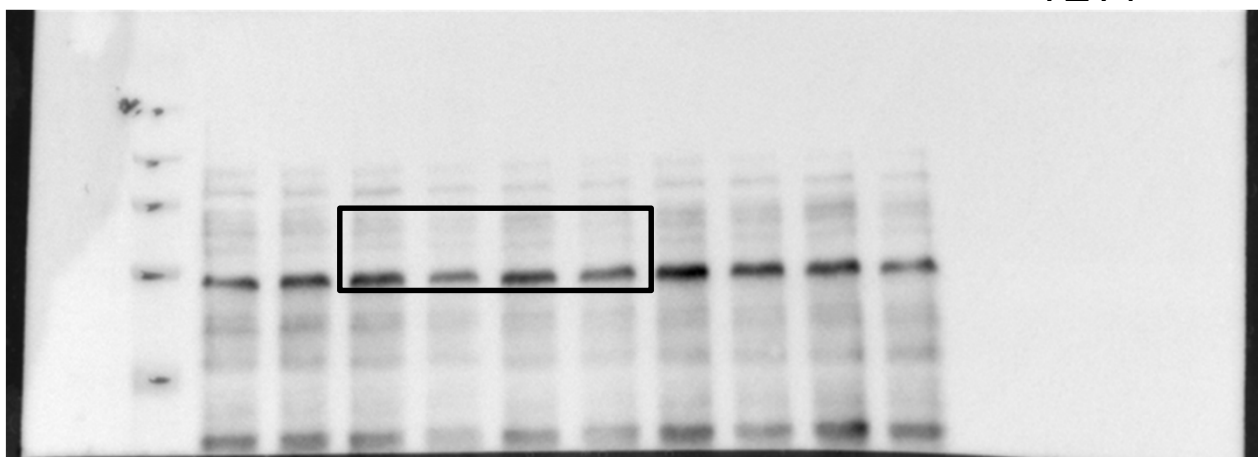

ACE

315 -  
250 -  
180 -  
130 -  
95 -  
72 -

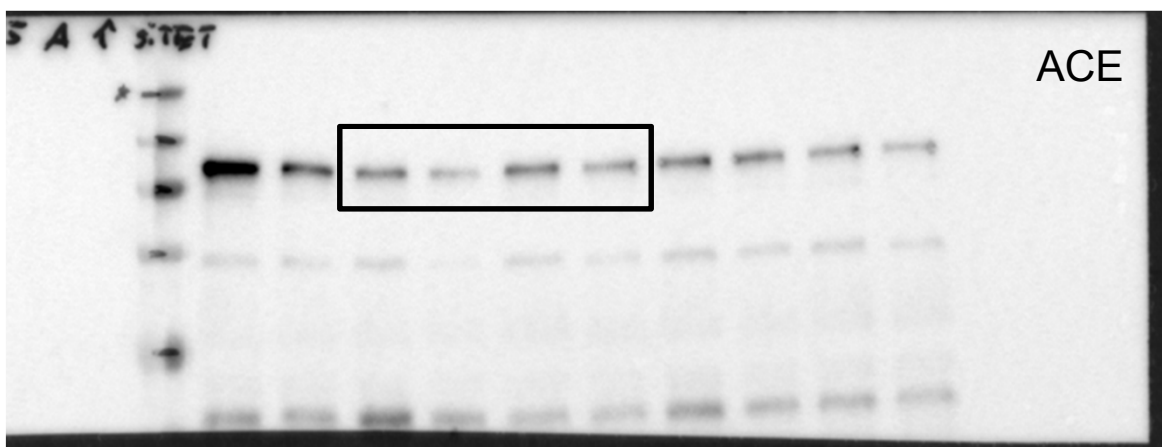

NMM

315 -  
250 -  
180 -  
130 -  
95 -  
72 -

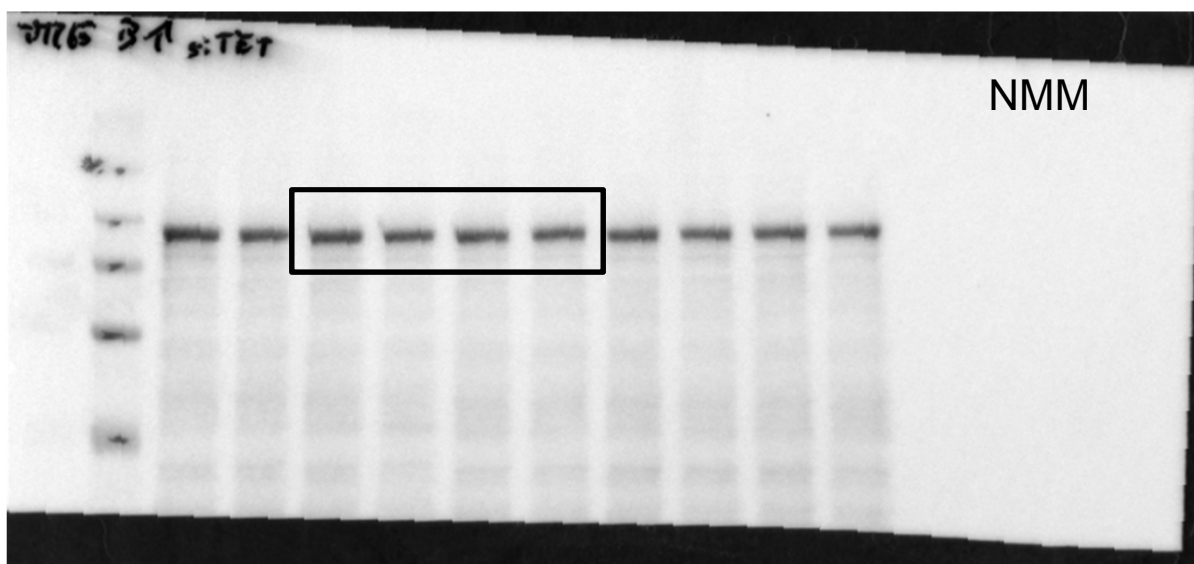

# Supplement Figure S2

## B

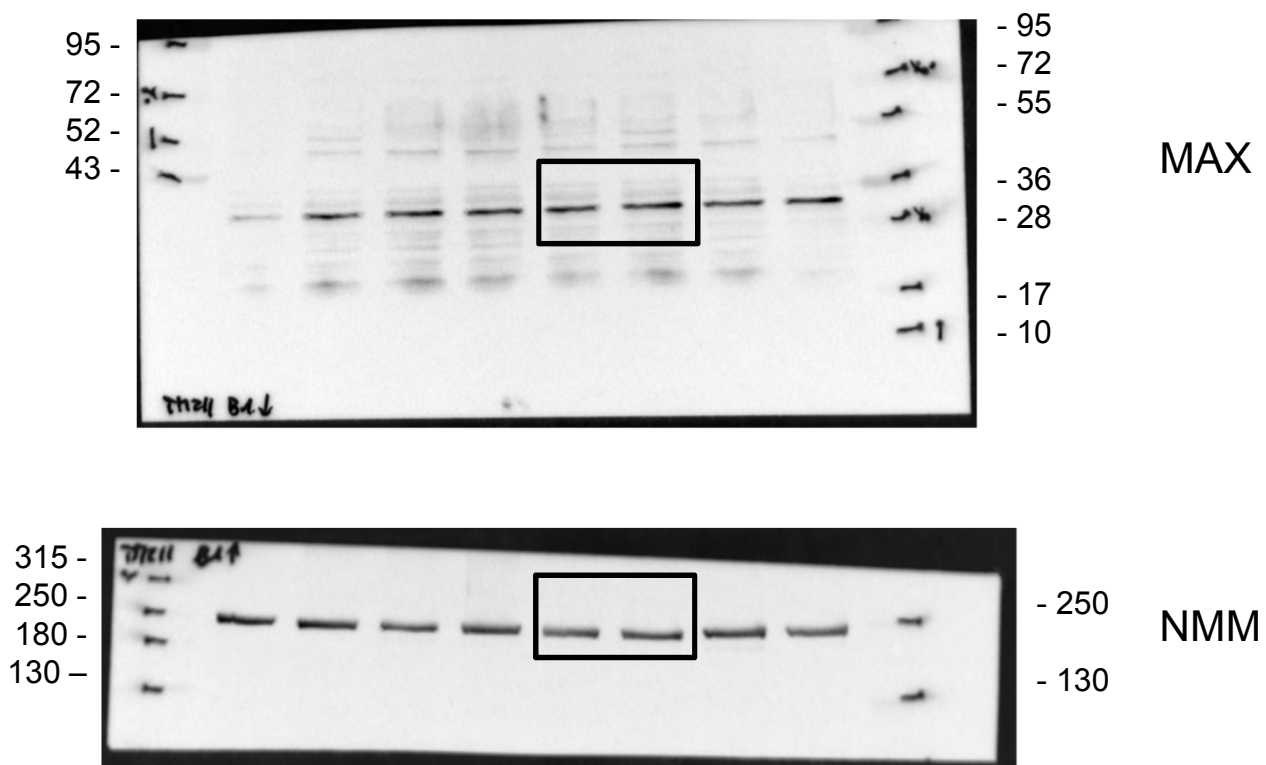

Supplement: S4 (10.1371/journal.pone.0216218.s004) [file journal.pone.0216218.s004.pdf]
